# Supplementary material for: Merit and Justice: An Experimental Analysis of Attitude to Inequality
Source: PLOS journal article supplement (doi:10.1371/journal.pone.0114512), 2014-12-09
Supplement: S1 (10.1371/journal.pone.0114512.s001) [file journal.pone.0114512.s001]

**Supporting Information for the article**  
**“Merit and Justice: An Experimental Analysis of Attitude to Inequality”**  
**by Aldo Rustichini and Alexander Vostroknutov**

**Table S1**

**Decision to subtract: OLS clustered by session.**

|             | 1                   | 2                   | 3                   | 4                   | 5                   | 6                   |
|-------------|---------------------|---------------------|---------------------|---------------------|---------------------|---------------------|
|             | All obs.            | All obs.            | All obs.            | First Game          | Pay                 | No Pay              |
|             | b/se                | b/se                | b/se                | b/se                | b/se                | b/se                |
| Gap         | 0.123<br>(0.103)    | 0.123<br>(0.103)    | -0.110<br>(0.115)   | -0.204<br>(0.176)   | -0.220<br>(0.150)   | -0.070<br>(0.146)   |
| Skill       |                     | -0.023<br>(0.046)   | -0.280**<br>(0.106) | -0.408*<br>(0.205)  | -0.319**<br>(0.139) | -0.312**<br>(0.134) |
| Gap × Skill |                     |                     | 0.495***<br>(0.132) | 0.734**<br>(0.250)  | 0.571**<br>(0.240)  | 0.587***<br>(0.134) |
| constant    | 0.615***<br>(0.084) | 0.626***<br>(0.082) | 0.748***<br>(0.090) | 0.791***<br>(0.123) | 0.614***<br>(0.120) | 0.590***<br>(0.112) |
| N           | 336                 | 336                 | 336                 | 168                 | 208                 | 237                 |
