# Supplementary material for: Merit and Justice: An Experimental Analysis of Attitude to Inequality
Source: PLOS journal article supplement (doi:10.1371/journal.pone.0114512), 2014-12-09
Supplement: S2 (10.1371/journal.pone.0114512.s002) [file journal.pone.0114512.s002]

**Supporting Information for the article**  
**“Merit and Justice: An Experimental Analysis of Attitude to Inequality”**  
**by Aldo Rustichini and Alexander Vostroknutov**

**Table S2**

**Amount Subtracted after payment: OLS clustered by session.** The dependent variable is the amount subtracted by the subjects who paid for the subtraction.

|             | 1                   | 2                   | 3                   | 4                   |
|-------------|---------------------|---------------------|---------------------|---------------------|
|             | All subs.           | All subs.           | All subs.           | First Game          |
|             | b/se                | b/se                | b/se                | b/se                |
| Gap         | 0.384<br>(0.271)    | 0.389<br>(0.253)    | -0.152<br>(0.223)   | -0.036<br>(0.276)   |
| Skill       |                     | 0.428*<br>(0.202)   | -0.167<br>(0.307)   | -0.059<br>(0.392)   |
| Gap × Skill |                     |                     | 1.149<br>(0.718)    | 2.435***<br>(0.614) |
| constant    | 0.690***<br>(0.139) | 0.473***<br>(0.125) | 0.755***<br>(0.171) | 0.413*<br>(0.196)   |
| N           | 336                 | 336                 | 336                 | 168                 |
