# Supplementary material for: Merit and Justice: An Experimental Analysis of Attitude to Inequality
Source: PLOS journal article supplement (doi:10.1371/journal.pone.0114512), 2014-12-09
Supplement: S3 (10.1371/journal.pone.0114512.s003) [file journal.pone.0114512.s003]

Supporting Information for the article  
 “Merit and Justice: An Experimental Analysis of Attitude to Inequality”  
 by Aldo Rustichini and Alexander Vostroknutov

**Table S3**

**Fraction of amount subtracted over amount earned by the target: OLS clustered by session.**

|             | 1                   | 2                   | 3                   | 4                   |
|-------------|---------------------|---------------------|---------------------|---------------------|
|             | All subs.           | All subs.           | All subs.           | First Game          |
|             | b/se                | b/se                | b/se                | b/se                |
| Gap         | 0.014<br>(0.039)    | 0.014<br>(0.041)    | −0.115**<br>(0.051) | −0.073<br>(0.070)   |
| Skill       |                     | −0.037<br>(0.028)   | −0.179**<br>(0.064) | −0.096<br>(0.077)   |
| Gap × Skill |                     |                     | 0.274*<br>(0.138)   | 0.458***<br>(0.137) |
| constant    | 0.192***<br>(0.035) | 0.210***<br>(0.039) | 0.278***<br>(0.052) | 0.180***<br>(0.041) |
| N           | 336                 | 336                 | 336                 | 168                 |
