# Supplementary material for: Merit and Justice: An Experimental Analysis of Attitude to Inequality
Source: PLOS journal article supplement (doi:10.1371/journal.pone.0114512), 2014-12-09
Supplement: S4 (10.1371/journal.pone.0114512.s004) [file journal.pone.0114512.s004]

## Supporting Information for the article

“Merit and Justice: An Experimental Analysis of Attitude to Inequality”

by Aldo Rustichini and Alexander Vostroknutov

**Table S4**

Three regressions as presented in the main text but with the absolute amount won (Won) instead of the Gap variable. All regressions are run on the data from the first games only.

|                    | 1                       | 2                    | 3                      |
|--------------------|-------------------------|----------------------|------------------------|
|                    | Decision to<br>Subtract | Amount<br>Subtracted | Fraction<br>Subtracted |
|                    | b/se                    | b/se                 | b/se                   |
| Won                | 0.031<br>(0.034)        | 0.025<br>(0.057)     | 0.025*<br>(0.014)      |
| Skill              | 0.342***<br>(0.050)     | 2.866***<br>(0.311)  | 0.498***<br>(0.063)    |
| Won $\times$ Skill | -0.093***<br>(0.029)    | -0.370***<br>(0.078) | -0.095***<br>(0.017)   |
| constant           | 0.626***<br>(0.057)     | 0.458***<br>(0.146)  | 0.139***<br>(0.031)    |
| N                  | 168                     | 168                  | 168                    |
